# Supplementary material for: Ongoing Gaps in the Hepatitis C Care Cascade during the Direct-Acting Antiviral Era in a Large Retrospective Cohort in Canada: A Population-Based Study
Source: MDPI journal article supplement (doi:10.3390/v16030389), 2024-03-01
Supplement: s1 [file s1]

## Supplementary material

Table S1. List of codes used to identify comorbidities and liver-related disease in hospital, medical visits, and pharmacy dispensations data.

| Condition                                                                                   | Codes                                                                                                                                                                                                                                                                                                                                                                                                                                                                                                                                                                                                                                                                                                                                                                                                                                                                                                                                                                                                                                                                                                                                                                                                                                                                                                                                                                                                                                                                                                                                                                                                                                                                                                                                                                                                                                                                 |
|---------------------------------------------------------------------------------------------|-----------------------------------------------------------------------------------------------------------------------------------------------------------------------------------------------------------------------------------------------------------------------------------------------------------------------------------------------------------------------------------------------------------------------------------------------------------------------------------------------------------------------------------------------------------------------------------------------------------------------------------------------------------------------------------------------------------------------------------------------------------------------------------------------------------------------------------------------------------------------------------------------------------------------------------------------------------------------------------------------------------------------------------------------------------------------------------------------------------------------------------------------------------------------------------------------------------------------------------------------------------------------------------------------------------------------------------------------------------------------------------------------------------------------------------------------------------------------------------------------------------------------------------------------------------------------------------------------------------------------------------------------------------------------------------------------------------------------------------------------------------------------------------------------------------------------------------------------------------------------|
| <b>Injection drug use</b><br>(2 medical visits or 1 hospitalization or drug-related death)  | ICD-9 starting with: 3040, 3047, 3055, 9650, 3042, 3056, 970, 3041, 9694, 3054, 292, 3045, 3046, 3048, 3049, 3053, 3059, 6483, 7960, 9621, 9658, 9663, 9664, 9670, 9684, 9685, 9696, 9698, 9699, 970.<br>ICD-10 exact codes: T400, T401, T402, T403, T404, T406, R781, E8500, T405, R782, T436, T423, T424, T425, T426, T427, T428, V6542, T387, T408, T409, T412, T436, T437, T438, T439, T507; starting with: F11, F14, F13.<br>Drug-related mortality codes (death registry): F11, F12, F13, F14, F15, F16, F19, X40, X41, X42, X43, X44, X60, X61, X62, X63, X64, X85, Y10, Y11, Y12, Y13, Y14, Y40, Y41, Y42, Y43, Y44, Y45, Y46, Y47, Y48, Y49, Y50, Y51, Y52, Y53, Y54, Y55, Y56, Y570, Y571, Y572, Y573, Y574, Y577, Y578, Y579, Y598, Y880, D521, D590, D592, D611, D642, E032, E064, E231, E242, E273, F55, F551, G210, G211, G240, G251, G254, G256, G444, G620, G720, H263, I427, I952, J702, J703, J704, L105, L233, L244, L251, L270, L271, L432, L560, L561, L640, M022, M102, M320, M804, M814, M835, M871, N140, N141, N142, O355, P040, P041, P044, P584, P961, P962, R781, R782, R783, R784, R785, R786, R825, 304, 3052, 3053, 3054, 3055, 3056, 3057, 3058, 3059, 292, 9090, 965, 966, 967, 968, 969, 970, 971, 972, 973, 974, 975, 976, 977, 978, 979, 6483, 3576.                                                                                                                                                                                                                                                                                                                                                                                                                                                                                                                                                                              |
| <b>Elixhauser comorbidity index (modified)<sup>a</sup></b><br>(presence of at least 1 code) | Starting with :<br>Congestive Heart Failure: 39891, 40201, 40211, 40291, 40401, 40403, 40411, 40413, 40491, 40493, 4254, 4255, 4257, 4258, 4259, 428. Cardiac Arrhythmia: 4260, 42613, 4267, 4269, 42610, 42612, 4270, 4271, 4272, 4273, 4274, 4276, 4278, 4279, 7850, 99601, 99604, V450, V533. Valvular Disease: 0932, 394, 395, 396, 397, 424, 7463, 7464, 7465, 7466, V422, V433. Pulmonary Circulation Disorders: 4150, 4151, 416, 4170, 4178, 4179. Peripheral Vascular Disorders: 0930, 4373, 440, 441, 4431, 4432, 4438, 4439, 4471, 5571, 5579, V434. Hypertension: 401, 402, 403, 404, 405. Paralysis: 3341, 342, 343, 3440, 3441, 3442, 3443, 3444, 3445, 3446, 3449. Other Neurological Disorders: 3319, 3320, 3321, 3334, 3335, 33392, 334, 335, 3362, 340, 341, 345, 3481, 3483, 7803, 7843. Chronic Pulmonary Disease: 4168, 4169, 490, 491, 492, 493, 494, 495, 496, 500, 501, 502, 503, 504, 505, 5064, 5081, 5088. Hypothyroidism: 2409, 243, 244, 2461, 2468. Renal Failure: 40301, 40311, 40391, 40402, 40403, 40412, 40413, 40492, 40493, 585, 586, 5880, V420, V451, V56. Peptic Ulcer Disease excluding bleeding: 5317, 5319, 5327, 5329, 5337, 5339, 5347, 5349. Lymphoma: 200, 201, 202, 2030, 2386. Cancer: 196, 197, 198, 199, 140, 141, 142, 143, 144, 145, 146, 147, 148, 149, 150, 151, 152, 153, 154, 155, 156, 157, 158, 159, 160, 161, 162, 163, 164, 165, 166, 167, 168, 169, 170, 171, 172, 174, 175, 176, 177, 178, 179, 180, 181, 182, 183, 184, 185, 186, 187, 188, 189, 190, 191, 192, 193, 194, 195. Rheumatoid Arthritis/collagen: 446, 7010, 7100, 7101, 7102, 7103, 7104, 7108, 7109, 7112, 714, 7193, 720, 725, 7285, 72889, 72930. Coagulopathy: 286, 2871, 2873, 2874, 2875. Obesity/weight loss/Fluid and Electrolyte Disorders: 2780, 260, 261, 262, 263, 7832, 7994, 2536, 276. Anemia: 2800, 2801, 2808, 2809, 281. |
| <b>Diabetes</b><br>(2 medical visits within 2 years or 1                                    | ICD-9 starting with: 250.<br>ICD-10 starting with: E10, E11, E12, E13, E14.                                                                                                                                                                                                                                                                                                                                                                                                                                                                                                                                                                                                                                                                                                                                                                                                                                                                                                                                                                                                                                                                                                                                                                                                                                                                                                                                                                                                                                                                                                                                                                                                                                                                                                                                                                                           |

|                                                                                                                                                                         |                                                                                                                                                                                                                                                                                                                                                                                                                                                                                                                                                                                                                                                                                                                                                                                                                                                                                                         |
|-------------------------------------------------------------------------------------------------------------------------------------------------------------------------|---------------------------------------------------------------------------------------------------------------------------------------------------------------------------------------------------------------------------------------------------------------------------------------------------------------------------------------------------------------------------------------------------------------------------------------------------------------------------------------------------------------------------------------------------------------------------------------------------------------------------------------------------------------------------------------------------------------------------------------------------------------------------------------------------------------------------------------------------------------------------------------------------------|
| hospitalization or 1 prescription for antidiabetic drug)                                                                                                                | Pharmacy dispensation common denomination codes: 46300, 47151, 05824, 46862, 47208, 47807, 47832, 47964, 47965, 48017, 48044, 48117, 48134, 48137, 47817, 47715, 48018, 47881, 47867, 47836, 48200, 48085, 04823, 04888, 18296, 18309, 18322, 18335, 18348, 39120, 39133, 39146, 39159, 39172, 39185, 39458, 39484, 39497, 39523, 41655, 43033, 43735, 44151, 44164, 44476, 44489, 44502, 44996, 45405, 45415, 45483, 45511, 45531, 45534, 46322, 46536, 46537, 46538, 46592, 46602, 46603, 46607, 46798, 47004, 47206, 47424, 47426, 47536, 47586, 47615, 47749, 48163, 48174, 48223, 48243, 46568, 47357, 46810, 48013, 48062, 48039, 00091, 01937, 46056, 47329, 46799, 47427, 47652, 04264, 09672, 15184, 46642, 47371, 46678, 47392.                                                                                                                                                               |
| <b>Major mental health illness diagnosis</b><br>(2 medical visits or 1 hospitalization)                                                                                 | ICD-9 starting with: 295, 296, 297, 298, 300, 301, 308, 309, 311.<br>ICD-10 starting with: F20, F21, F22, F23, F24, F25, F28, F29, F30, F31, F32, F33, F34, F38, F39, F40, F41, F42, F43, F44, F45, F48, F60, F61.                                                                                                                                                                                                                                                                                                                                                                                                                                                                                                                                                                                                                                                                                      |
| <b>Alcohol use disorder</b><br>(2 medical visits or 1 hospitalization)                                                                                                  | ICD-9 starting with: 291, 303, 3039, 3050, 3575, 4255, 425, 5353, 7903, 9773, 980, V113<br>ICD-10 starting with: F10, E244, G312, G621, G721, I426, Z502, Z714, K292, T51                                                                                                                                                                                                                                                                                                                                                                                                                                                                                                                                                                                                                                                                                                                               |
| <b>HIV co-infection</b><br>(2 medical visits or 1 hospitalization within 2 years<br>OR<br>2 medical visits or 2 dispensation records of HIV medications within 2 years) | ICD-9 starting with: 042, 043, 044, V08.<br>ICD-10 starting with: B20, B21, B22, B23, B24, R75, Z21.<br>Pharmacy dispensation common denomination codes [any single drug, including Truvada, must be combined with at least one other drug AND treatment must be prescribed for more than 28 days]: 46769, 47422, 47576, 48221, 48026, 48251, 48043, 48295, 48247, 48258, 47724, 48114, 47946, 47895, 48122, 48160, 46520, 47310, 47397, 46714, 46769, 47422, 47576, 48221, 48026, 48251, 48043, 48295, 48247, 48258, 47724, 48114, 47946, 47895, 48122, 48160, 46520, 47310, 47397, 46714, 47605, 47701, 46564, 47324, 46581, 45611, 46514, 47147, 46311, 47171, 47502, 47512, 45589, 45516, 47313, 46461, 46544, 47323, 47727, 46505, 47294, 47876, 47891, 48226, 47479, 47623, 47632, 47543, 46475, 47293, 46313, 47170, 46519, 47158, 47306, 47585, 47167, 46743, 47423, 47984, 47700, 47466, 45611 |
| <b>Decompensated cirrhosis</b><br>(2 medical visits or 1 hospitalization)                                                                                               | ICD-9 starting with: 4560, 4562, 5672, 5713, 5722, 5724, 5728, 7895, 0704.<br>ICD-10 starting with: K652, K704, K721, K729, K767, I850, I982, I9820, I983, R18.                                                                                                                                                                                                                                                                                                                                                                                                                                                                                                                                                                                                                                                                                                                                         |
| <b>Hepatocellular carcinoma</b><br>(2 medical visits or 1 hospitalization)                                                                                              | ICD-9 : 1550.<br>ICD: C220.                                                                                                                                                                                                                                                                                                                                                                                                                                                                                                                                                                                                                                                                                                                                                                                                                                                                             |

\*Codes for diabetes, mental health illness, alcohol and drug consumption disorders, HIV, and liver-disease excluded.

**Table S2.** Validation of the PWID algorithm in Quebec data.

We used a published algorithm for identifying PWID in health administrative data that has been validated in BC and ON (1, 2). To validate this algorithm in Quebec we used a cohort of PWID (2004-2018) from HEPCO (3, 4) for true positives. The true negative reference standard comprised a random population sample from the FIPA database presumed to be non-PWID based on the low prevalence of injection drug use in Quebec (0.3%) (5) matched to the HCV cases on sex, age, and rurality at a 333:1 ratio. This generated a dataset of 829 PWID (HEPCO, 0.3%) and 276,057 individuals from the general population (FIPA, presumed non-PWID, 99.7%). Codes used in medical visits, hospitalization, and mortality data to identify PWID are described in **Table S1**.

| Algorithm description                                      | Sensitivity | 95% CI     | Specificity | 95% CI       | PPV                     | NPV                | Accuracy                 |
|------------------------------------------------------------|-------------|------------|-------------|--------------|-------------------------|--------------------|--------------------------|
| 1 medical visit or 1 hospitalization or drug-related death | 100%        | 99.54, 100 | 99.16%      | 99.12, 99.19 | 26.24%<br>(24.74, 27.8) | 100%<br>(100, 100) | 99.16%<br>(99.12, 99.19) |

**Table S3.** Algorithms for treatment initiations not covered by the provincial pharmacy prescription plan.

Quebec pharmacy dispensations data covered 68% of the HCV cohort for the entire study period (1990-2018). Treatment status for the remaining 32% of the cohort was imputed with a multiple logistic regression predictive model developed using the subset of individuals fully covered in a 60%/40% training/validation data split (6). The model was constructed based on the pattern of individuals' RNA tests and genotyping, adjusted for socioeconomic characteristics, medical comorbidities, and liver-related diseases. It showed high discrimination (c-statistic of 0.902), and was 75% sensitive and 88% specific at predicting treatment initiation. The total number of observed and imputed HCV-specific antiviral treatment initiations between 2016-2018 was benchmarked with reported DAA prescriptions during the same period by the Institute for Human Data Science (IQVIA) (7, 8). The date of imputed treatment initiations was imputed based on the dates and patterns of RNA tests, which was 95% accurate to the calendar year of treatment initiation when validated in the observed treatment initiations cohort.

#### **Treatment initiation algorithm**

##### Step 1: Multiple logistic regression model

- Outcome: observed treatment initiations
- Main exposure of interest:
  - o Total count of RNA tests on record and a squared term (due to non-linear association)
  - o Total count of genotype tests on record and a squared term (due to non-linear association)
  - o Last RNA test result on record
  - o An interaction term for people who inject drugs and total RNA tests count (to correct for more frequent RNA testing of anti-HCV-negative PWID that could result in higher false-positives among PWID)
  - o Calendar year of HCV diagnosis
- Additional baseline characteristics:
  - o Sociodemographic characteristics: sex, age and age squared, immigrant status, PWID status, region of residence, material and social deprivation status
  - o Comorbidities/liver-related disease: decompensated cirrhosis and hepatocellular carcinoma

##### Step 2: Different cutoffs for predicted probability of treatment initiations by calendar year of HCV diagnosis (data-driven approach to obtain a balance of highest sensitivity and specificity)\*

- 1990-2004: 0.435
- 2005-2013: 0.380
- 2014: 0.300
- 2015: 0.250
- 2016-2017: 0.220
- 2018: 0.120

\*To account for different follow-up time, changes in RNA monitoring during treatment, and resulting inverse correlation between total count of RNA tests on record and calendar year of HCV diagnosis.

#### **Date of algorithm-imputed treatment initiation**

Date of treatment initiation = date of 3<sup>rd</sup> RNA test on record (data-driven approach to obtain the highest accuracy)

- If interval between 3<sup>rd</sup> and 5<sup>th</sup> RNA test on record greater than 18 months:

- Date of treatment initiation = date of 5<sup>th</sup> RNA test on record
- Validation by calendar-year only

**Table S4.** Characteristics of individuals diagnosed with HCV in 1990-2018 and living in Quebec, Canada as of 2018, in full cohort and imputed cohort.

|                                      | Full Cohort               |                            |                             | Imputed Cohort            |
|--------------------------------------|---------------------------|----------------------------|-----------------------------|---------------------------|
| Characteristics                      | <i>Total</i><br>(n=42514) | <i>Linked</i><br>(n=37949) | <i>Unlinked</i><br>(n=4565) | <i>Total</i><br>(n=42514) |
| <i>Total diagnosed</i>               | 42514 (100.0)             | 37949 (100.0)              | 4565 (100.0)                | 42514 (100.0)             |
| <i>Died</i>                          | 9952 (23.4)               | 9952 (26.2)                |                             | 11075 (26.0)              |
| <i>Missing</i>                       |                           |                            | 4565 (100.0)                |                           |
| <b>Living as of 2018</b>             | <b>27997 (65.9)</b>       | <b>27997 (73.8)</b>        |                             | <b>31439 (74.0)</b>       |
| <b>Age, mean (SD)</b>                | 41.7 (13.1)               | 41.7 (12.9)                | 41.6 (14.6)                 | 41.5 (12.9)               |
| <b>Birth cohort</b>                  |                           |                            |                             |                           |
| <1945                                | 1870 (5.7)                | 1594 (5.7)                 | 276 (6.0)                   | 1756 (5.6)                |
| 1945-1965                            | 17048 (52.4)              | 15579 (55.7)               | 1469 (32.2)                 | 17220 (54.8)              |
| >1965                                | 12087 (37.12)             | 10824 (38.7)               | 1263 (27.7)                 | 12463 (39.6)              |
| Missing                              | 1557 (4.8)                | -- --                      | 1557 (34.1)                 |                           |
| <b>Sex</b>                           |                           |                            |                             |                           |
| Female                               | 10572 (32.5)              | 9701 (34.7)                | 871 (19.1)                  | 10700 (34.0)              |
| Male                                 | 20540 (63.1)              | 18296 (65.3)               | 2244 (49.2)                 | 20739 (66.0)              |
| Missing                              | 1450 (4.5)                | -- --                      | 1450 (31.8)                 |                           |
| <b>Region of residence</b>           |                           |                            |                             |                           |
| Urban                                | 21571 (66.2)              | 18449 (65.9)               | 3122 (68.4)                 | 20775 (66.1)              |
| Rural                                | 10904 (33.5)              | 9464 (33.8)                | 1440 (31.5)                 | 10664 (33.9)              |
| Missing                              | 87 (0.3)                  | 84 (0.3)                   | 3 (0.1)                     |                           |
| <b>Social deprivation quintile</b>   |                           |                            |                             |                           |
| 1 (Least deprived)                   | 2828 (8.7)                | 2828 (10.1)                | -- --                       | 3176 (10.1)               |
| 2                                    | 3470 (10.7)               | 3470 (12.4)                | -- --                       | 3932 (12.5)               |
| 3                                    | 4296 (13.2)               | 4296 (15.3)                | -- --                       | 4938 (15.7)               |
| 4                                    | 6508 (20.0)               | 6508 (23.2)                | -- --                       | 7524 (23.9)               |
| 5 (Most deprived)                    | 10317 (31.7)              | 10317 (36.9)               | -- --                       | 11869 (37.8)              |
| Missing                              | 5143 (15.8)               | 578 (2.1)                  | 4565 (100.0)                |                           |
| <b>Material deprivation quintile</b> |                           |                            |                             |                           |
| 1 (Least deprived)                   | 3892 (12.0)               | 3892 (13.9)                | -- --                       | 4483 (14.3)               |
| 2                                    | 4191 (12.9)               | 4191 (15.0)                | -- --                       | 4801 (15.3)               |
| 3                                    | 4932 (15.1)               | 4932 (17.6)                | -- --                       | 5680 (18.1)               |
| 4                                    | 6051 (18.6)               | 6051 (21.6)                | -- --                       | 6939 (22.1)               |
| 5 (Most deprived)                    | 8353 (25.7)               | 8353 (29.8)                | -- --                       | 9536 (30.3)               |

|                                                        |                |                    |                 |                    |
|--------------------------------------------------------|----------------|--------------------|-----------------|--------------------|
| Missing                                                | 5143 (15.8)    | 578 (2.1)          | 4565<br>(100.0) |                    |
| <b>Immigrant status</b>                                |                |                    |                 |                    |
| Immigrant                                              | 4166 (12.8)    | 4166 (14.9)        | -- --           | 4862 (15.5)        |
| Non-immigrant                                          | 23831 (73.2)   | 23831<br>(85.1)    | -- --           | 26577<br>(84.5)    |
| Missing                                                | 4565 (14.0)    | -- --              | 4565<br>(100.0) |                    |
| <b>Region of origin</b>                                |                |                    |                 |                    |
| East Asia And Pacific                                  | 714 (17.1)     | 714 (17.1)         | -- --           | 915 (18.8)         |
| South Asia                                             | 408 (9.8)      | 408 (9.8)          | -- --           | 545 (11.2)         |
| Middle East & North Africa                             | 505 (12.1)     | 505 (12.1)         | -- --           | 631 (13.0)         |
| Sub Saharan Africa                                     | 602 (14.5)     | 602 (14.5)         | -- --           | 854 (17.6)         |
| High Income Europe                                     | 596 (14.3)     | 596 (14.3)         | -- --           | 783 (16.1)         |
| Middle Income Europe & Central Asia                    | 433 (10.4)     | 433 (10.4)         | -- --           | 579 (11.9)         |
| Latin America And Caribbean                            | 377 (9.0)      | 377 (9.0)          | -- --           | 477 (9.8)          |
| United States, Australia And New Zealand               | 52 (1.2)       | 52 (1.2)           | -- --           | 78 (1.6)           |
| Missing                                                | 479 (11.5)     | 479 (11.5)         | -- --           |                    |
| <b>Immigration category</b>                            |                |                    |                 |                    |
| Economic                                               | 1266 (30.4)    | 1266 (30.4)        | -- --           | 1682 (34.6)        |
| Family                                                 | 1209 (29.0)    | 1209 (29.0)        | -- --           | 1549 (31.9)        |
| Refugee                                                | 1156 (27.7)    | 1156 (27.7)        | -- --           | 1498 (30.8)        |
| Other                                                  | 57 (1.4)       | 57 (1.4)           | -- --           | 132 (2.7)          |
| Missing                                                | 478 (11.5)     | 478 (11.5)         | -- --           |                    |
| <b>Language proficiency</b>                            |                |                    |                 |                    |
| French only                                            | 1092 (26.2)    | 1092 (26.2)        | -- --           | 1419 (29.2)        |
| French and English                                     | 750 (18.0)     | 750 (18.0)         | -- --           | 1066 (21.9)        |
| English only                                           | 672 (16.1)     | 672 (16.1)         | -- --           | 884 (18.2)         |
| Neither                                                | 1165 (28.0)    | 1165 (28.0)        | -- --           | 1493 (30.7)        |
| Missing                                                | 487 (11.7)     | 487 (11.7)         | -- --           |                    |
| <b>Highest education level</b>                         |                |                    |                 |                    |
| High school or less                                    | 1823 (43.8)    | 1823 (43.8)        | -- --           | 2445 (50.3)        |
| Certificate/diploma                                    | 928 (22.3)     | 928 (22.3)         | -- --           | 1214 (25.0)        |
| University/Postgraduate                                | 836 (20.1)     | 836 (20.1)         | -- --           | 1203 (24.8)        |
| Missing                                                | 579 (13.9)     | 579 (13.9)         | -- --           |                    |
| <b>Years from admission to diagnosis, median (IQR)</b> | 6.6 (1.1-14.5) | 6.6 (1.1-<br>14.5) | -- --           | 6.5 (1.1-<br>14.3) |
| Missing                                                | 478.0 (11.0)   | 478.0 (11.0)       |                 |                    |
| <b>People who inject drugs</b>                         |                |                    |                 |                    |
| Yes                                                    | 12529 (38.5)   | 12529<br>(44.7)    | -- --           | 14008<br>(44.6)    |
| No                                                     | 15468 (47.5)   | 15468<br>(55.3)    | -- --           | 17431<br>(55.4)    |
| Missing                                                | 4565 (14.0)    | -- --              | 4565<br>(100.0) |                    |
| <b>Comorbidities (at baseline)</b>                     |                |                    |                 |                    |
| Major mental health illness                            |                |                    |                 |                    |
| Yes                                                    | 7761 (23.8)    | 7761 (27.7)        | -- --           | 8685 (27.6)        |
| No                                                     | 20236 (62.1)   | 20236<br>(72.3)    | -- --           | 22755<br>(72.4)    |
| Missing                                                | 4565 (14.0)    | -- --              | 4565<br>(100.0) |                    |
| Alcohol use disorder                                   |                |                    |                 |                    |
| Yes                                                    | 2651 (8.1)     | 2651 (9.5)         | -- --           | 3095 (9.8)         |
| No                                                     | 25346 (77.8)   | 25346<br>(90.5)    | -- --           | 28344<br>(90.2)    |
| Missing                                                | 4565 (14.0)    | -- --              | 4565<br>(100.0) |                    |

|                               |              |                 |                 |                 |
|-------------------------------|--------------|-----------------|-----------------|-----------------|
| HBV coinfection               |              |                 |                 |                 |
| Yes                           | 867 (2.7)    | 867 (3.1)       | -- --           | 1002 (3.2)      |
| No                            | 27130 (83.3) | 27130<br>(96.9) | -- --           | 30437<br>(96.8) |
| Missing                       | 4565 (14.0)  | -- --           | 4565<br>(100.0) |                 |
| HIV coinfection               |              |                 |                 |                 |
| Yes                           | 981 (3.0)    | 981 (3.5)       | -- --           | 1272 (4.0)      |
| No                            | 27016 (83.0) | 27016<br>(96.5) | -- --           | 30167<br>(96.0) |
| Missing                       | 4565 (14.0)  | -- --           | 4565<br>(100.0) |                 |
| <b>Liver-related outcomes</b> |              |                 |                 |                 |
| Decompensated cirrhosis       |              |                 |                 |                 |
| Yes                           | 431 (1.3)    | 431 (1.5)       | -- --           | 675 (2.1)       |
| No                            | 27566 (84.7) | 27566<br>(98.5) | -- --           | 30764<br>(97.9) |
| Missing                       | 4565 (14.0)  | -- --           | 4565<br>(100.0) |                 |
| Hepatocellular carcinoma      |              |                 |                 |                 |
| Yes                           | 29 (0.1)     | 29 (0.1)        | -- --           | 251 (0.8)       |
| No                            | 27968 (85.9) | 27968<br>(99.9) | -- --           | 31189<br>(99.2) |
| Missing                       | 4565 (14.0)  | -- --           | 4565<br>(100.0) |                 |

IQR, interquartile range.

**Table S5.** Immigrant cascade of care of individuals diagnosed with HCV in 1990-2018 and living in Quebec, Canada as of 2018, stratified by care cascade stages, with row percentages as a proportion of the previous column.

| Characteristics<br>n (row % of previous column)        | HCV diagnosed<br>n (%) | RNA tested<br>n (%) | RNA positive<br>n (%) | Genotyped<br>n (%) | Initiated treatment<br>n (%) | Assessed for SVR<br>n (%) | SVR<br>n (%) |
|--------------------------------------------------------|------------------------|---------------------|-----------------------|--------------------|------------------------------|---------------------------|--------------|
| <b>Total</b>                                           | 4862 (100.0)           | 4220 (86.8)         | 3377 (80.0)           | 3142 (93.0)        | 2388 (76.0)                  | 1996 (83.6)               | 1844 (92.4)  |
| <b>Birth cohort</b>                                    |                        |                     |                       |                    |                              |                           |              |
| <1945                                                  | 487 (100.0)            | 371 (76.2)          | 316 (85.2)            | 267 (84.5)         | 165 (61.8)                   | 132 (80.0)                | 121 (91.7)   |
| 1945-1965                                              | 2438 (100.0)           | 2130 (87.4)         | 1773 (83.2)           | 1677 (94.6)        | 1332 (79.4)                  | 1116 (83.8)               | 1031 (92.4)  |
| >1965                                                  | 1938 (100.0)           | 1719 (88.7)         | 1288 (74.9)           | 1198 (93.0)        | 890 (74.3)                   | 748 (84.0)                | 693 (92.6)   |
| <b>Sex</b>                                             |                        |                     |                       |                    |                              |                           |              |
| Female                                                 | 2177 (100.0)           | 1888 (86.7)         | 1498 (79.3)           | 1383 (92.3)        | 1018 (73.6)                  | 857 (84.2)                | 791 (92.3)   |
| Male                                                   | 2685 (100.0)           | 2332 (86.9)         | 1879 (80.6)           | 1759 (93.6)        | 1370 (77.9)                  | 1139 (83.1)               | 1053 (92.4)  |
| <b>Region of residence</b>                             |                        |                     |                       |                    |                              |                           |              |
| Urban                                                  | 4367 (100.0)           | 3797 (86.9)         | 3048 (80.3)           | 2824 (92.7)        | 2150 (76.1)                  | 1800 (83.7)               | 1664 (92.4)  |
| Rural                                                  | 495 (100.0)            | 423 (85.5)          | 329 (77.8)            | 318 (96.7)         | 238 (74.8)                   | 197 (82.8)                | 180 (91.4)   |
| <b>Social deprivation quintile</b>                     |                        |                     |                       |                    |                              |                           |              |
| 1 (Least deprived)                                     | 477 (100.0)            | 420 (88.1)          | 341 (81.2)            | 314 (92.1)         | 245 (78.0)                   | 207 (84.5)                | 198 (95.7)   |
| 2                                                      | 557 (100.0)            | 491 (88.2)          | 391 (79.6)            | 370 (94.6)         | 273 (73.8)                   | 241 (88.3)                | 218 (90.5)   |
| 3                                                      | 848 (100.0)            | 731 (86.2)          | 572 (78.2)            | 533 (93.2)         | 407 (76.4)                   | 341 (83.8)                | 315 (92.4)   |
| 4                                                      | 1282 (100.0)           | 1104 (86.1)         | 900 (81.5)            | 843 (93.7)         | 643 (76.3)                   | 533 (82.9)                | 490 (91.9)   |
| 5 (Most deprived)                                      | 1699 (100.0)           | 1474 (86.8)         | 1173 (79.6)           | 1082 (92.2)        | 819 (75.7)                   | 674 (82.3)                | 624 (92.6)   |
| <b>Material deprivation quintile</b>                   |                        |                     |                       |                    |                              |                           |              |
| 1 (Least deprived)                                     | 797 (100.0)            | 698 (87.6)          | 545 (78.1)            | 513 (94.1)         | 403 (78.6)                   | 355 (88.1)                | 326 (91.8)   |
| 2                                                      | 826 (100.0)            | 718 (86.9)          | 590 (82.2)            | 556 (94.2)         | 412 (74.1)                   | 354 (85.9)                | 330 (93.2)   |
| 3                                                      | 819 (100.0)            | 722 (88.2)          | 577 (79.9)            | 528 (91.5)         | 417 (79.0)                   | 347 (83.2)                | 321 (92.5)   |
| 4                                                      | 889 (100.0)            | 772 (86.8)          | 632 (81.9)            | 593 (93.8)         | 451 (76.1)                   | 374 (82.9)                | 340 (90.9)   |
| 5 (Most deprived)                                      | 1531 (100.0)           | 1311 (85.6)         | 1032 (78.7)           | 951 (92.2)         | 705 (74.1)                   | 567 (80.4)                | 528 (93.1)   |
| <b>Region of origin</b>                                |                        |                     |                       |                    |                              |                           |              |
| East Asia and Pacific                                  | 915 (100.0)            | 765 (83.6)          | 602 (78.7)            | 562 (93.4)         | 439 (78.1)                   | 353 (80.4)                | 341 (96.6)   |
| South Asia                                             | 545 (100.0)            | 482 (88.4)          | 392 (81.3)            | 367 (93.6)         | 270 (73.6)                   | 217 (80.4)                | 201 (92.6)   |
| Middle East And North Africa                           | 631 (100.0)            | 547 (86.7)          | 430 (78.6)            | 390 (90.7)         | 301 (77.2)                   | 258 (85.7)                | 231 (89.5)   |
| Sub Saharan Africa                                     | 854 (100.0)            | 767 (89.8)          | 622 (81.1)            | 578 (92.9)         | 434 (75.1)                   | 355 (81.8)                | 314 (88.5)   |
| High income Europe                                     | 783 (100.0)            | 683 (87.2)          | 547 (80.1)            | 520 (95.1)         | 408 (78.5)                   | 363 (89.0)                | 342 (94.2)   |
| Middle Income Europe                                   |                        |                     |                       |                    |                              |                           |              |
| And Central Asia                                       | 579 (100.0)            | 523 (90.3)          | 404 (77.2)            | 380 (94.1)         | 286 (75.3)                   | 242 (84.6)                | 225 (93.0)   |
| Latin America And Caribbean                            | 477 (100.0)            | 388 (81.3)          | 323 (83.2)            | 291 (90.1)         | 205 (70.4)                   | 165 (80.5)                | 153 (92.7)   |
| United States, Australia and New Zealand               | 78 (100.0)             | 65 (83.3)           | 57 (87.7)             | 54 (94.7)          | 45 (83.3)                    | 43 (95.6)                 | 38 (88.4)    |
| <b>Language proficiency</b>                            |                        |                     |                       |                    |                              |                           |              |
| French only                                            | 1419 (100.0)           | 1244 (87.7)         | 1028 (82.6)           | 951 (92.5)         | 720 (75.7)                   | 599 (83.2)                | 548 (91.5)   |
| French and English                                     | 1066 (100.0)           | 948 (88.9)          | 724 (76.4)            | 684 (94.5)         | 532 (77.8)                   | 452 (85.0)                | 420 (92.9)   |
| English only                                           | 884 (100.0)            | 777 (87.9)          | 629 (81.0)            | 591 (94.0)         | 466 (78.8)                   | 387 (83.0)                | 350 (90.4)   |
| Neither                                                | 1493 (100.0)           | 1251 (83.8)         | 995 (79.5)            | 916 (92.1)         | 671 (73.3)                   | 558 (83.2)                | 527 (94.4)   |
| <b>Highest education level</b>                         |                        |                     |                       |                    |                              |                           |              |
| High school or less                                    | 2445 (100.0)           | 2080 (85.1)         | 1685 (81.0)           | 1541 (91.5)        | 1149 (74.6)                  | 943 (82.1)                | 884 (93.7)   |
| Certificate/diploma                                    | 1214 (100.0)           | 1065 (87.7)         | 870 (81.7)            | 828 (95.2)         | 637 (76.9)                   | 536 (84.1)                | 487 (90.9)   |
| University/Postgraduate                                | 1203 (100.0)           | 1075 (89.4)         | 822 (76.5)            | 773 (94.0)         | 601 (77.7)                   | 517 (86.0)                | 473 (91.5)   |
| <b>Years from admission to diagnosis (by quantile)</b> |                        |                     |                       |                    |                              |                           |              |
| 0-25                                                   | 1276 (100.0)           | 1128 (88.4)         | 875 (77.6)            | 809 (92.5)         | 624 (77.1)                   | 519 (83.2)                | 466 (89.8)   |
| 25-50                                                  | 1299 (100.0)           | 1108 (85.3)         | 872 (78.7)            | 825 (94.6)         | 627 (76.0)                   | 509 (81.2)                | 473 (92.9)   |
| 50-75                                                  | 1154 (100.0)           | 994 (86.1)          | 805 (81.0)            | 753 (93.5)         | 580 (77.0)                   | 484 (83.4)                | 445 (91.9)   |
| 75-100                                                 | 1133 (100.0)           | 990 (87.4)          | 825 (83.3)            | 756 (91.6)         | 556 (73.5)                   | 484 (87.1)                | 461 (95.2)   |



| Characteristics<br>n (row % of previous column) | HCV diagnosed<br>n (%) | RNA tested<br>n (%) | RNA positive<br>n (%) | Genotyped<br>n (%) | Initiated treatment<br>n (%) | Assessed for SVR<br>n (%) | SVR<br>n (%) |
|-------------------------------------------------|------------------------|---------------------|-----------------------|--------------------|------------------------------|---------------------------|--------------|
| <b>Decade of admission</b>                      |                        |                     |                       |                    |                              |                           |              |
| 1980-1989                                       | 2027 (100.0)           | 1738 (85.7)         | 1486 (85.5)           | 1406 (94.6)        | 1142 (81.2)                  | 958 (83.9)                | 889 (92.8)   |
| 1990-1999                                       | 1124 (100.0)           | 958 (85.2)          | 776 (81.0)            | 714 (92.0)         | 517 (72.4)                   | 427 (82.6)                | 394 (92.3)   |
| 2000-2009                                       | 1098 (100.0)           | 959 (87.3)          | 730 (76.1)            | 681 (93.3)         | 492 (72.2)                   | 416 (84.6)                | 378 (90.9)   |
| 2010-2018                                       | 613 (100.0)            | 565 (92.2)          | 385 (68.1)            | 341 (88.6)         | 237 (69.5)                   | 195 (82.3)                | 183 (93.8)   |
| <b>People who inject drugs</b>                  |                        |                     |                       |                    |                              |                           |              |
| Yes                                             | 588 (100.0)            | 511 (86.9)          | 453 (88.6)            | 439 (96.9)         | 353 (80.4)                   | 284 (80.5)                | 258 (90.8)   |
| No                                              | 4274 (100.0)           | 3709 (86.8)         | 2924 (78.8)           | 2703 (92.4)        | 2035 (75.3)                  | 1712 (84.1)               | 1586 (92.6)  |
| <b>Major mental health illness</b>              |                        |                     |                       |                    |                              |                           |              |
| Yes                                             | 511 (100.0)            | 439 (85.9)          | 367 (83.6)            | 344 (93.7)         | 258 (75.0)                   | 217 (84.1)                | 199 (91.7)   |
| No                                              | 4351 (100.0)           | 3781 (86.9)         | 3010 (79.6)           | 2798 (93.0)        | 2129 (76.1)                  | 1779 (83.6)               | 1645 (92.5)  |
| <b>Alcohol use disorder</b>                     |                        |                     |                       |                    |                              |                           |              |
| Yes                                             | 116 (100.0)            | 101 (87.1)          | 90 (89.1)             | 81 (90.0)          | 61 (75.3)                    | 50 (82.0)                 | 45 (90.0)    |
| No                                              | 4746 (100.0)           | 4119 (86.8)         | 3287 (79.8)           | 3061 (93.1)        | 2327 (76.0)                  | 1946 (83.6)               | 1799 (92.4)  |
| <b>HBV coinfection</b>                          |                        |                     |                       |                    |                              |                           |              |
| Yes                                             | 159 (100.0)            | 113 (71.1)          | 79 (69.9)             | 72 (91.1)          | 56 (77.8)                    | 45 (80.4)                 | 40 (88.9)    |
| No                                              | 4703 (100.0)           | 4107 (87.3)         | 3298 (80.3)           | 3070 (93.1)        | 2332 (76.0)                  | 1951 (83.7)               | 1805 (92.5)  |
| <b>HIV coinfection</b>                          |                        |                     |                       |                    |                              |                           |              |
| Yes                                             | 137 (100.0)            | 132 (96.4)          | 115 (87.1)            | 114 (99.1)         | 102 (89.5)                   | 93 (91.2)                 | 84 (90.3)    |
| No                                              | 4725 (100.0)           | 4088 (86.5)         | 3263 (79.8)           | 3029 (92.8)        | 2286 (75.5)                  | 1903 (83.2)               | 1760 (92.5)  |
| <b>Decompensated cirrhosis</b>                  |                        |                     |                       |                    |                              |                           |              |
| Yes                                             | 144 (100.0)            | 133 (92.4)          | 118 (88.7)            | 114 (96.6)         | 97 (85.1)                    | 82 (84.5)                 | 73 (89.0)    |
| No                                              | 4718 (100.0)           | 4087 (86.6)         | 3259 (79.7)           | 3028 (92.9)        | 2291 (75.7)                  | 1914 (83.5)               | 1771 (92.5)  |
| <b>Hepatocellular carcinoma</b>                 |                        |                     |                       |                    |                              |                           |              |
| Yes                                             | 77 (100.0)             | 73 (94.8)           | 73 (100.0)            | 72 (98.6)          | 67 (93.1)                    | 52 (77.6)                 | 45 (86.5)    |
| No                                              | 4785 (100.0)           | 4147 (86.7)         | 3304 (79.7)           | 3070 (92.9)        | 2321 (75.6)                  | 1944 (83.8)               | 1799 (92.5)  |
| <b>Diabetes</b>                                 |                        |                     |                       |                    |                              |                           |              |
| Yes                                             | 454 (100.0)            | 395 (87.0)          | 354 (89.6)            | 322 (91.0)         | 252 (78.3)                   | 210 (83.3)                | 194 (92.4)   |
| No                                              | 4408 (100.0)           | 3825 (86.8)         | 3023 (79.0)           | 2820 (93.3)        | 2136 (75.7)                  | 1787 (83.7)               | 1651 (92.4)  |
| <b>Elixhauser comorbidity index (modified)</b>  |                        |                     |                       |                    |                              |                           |              |
| Yes                                             | 234 (100.0)            | 202 (86.3)          | 166 (82.2)            | 158 (95.2)         | 131 (82.9)                   | 100 (76.3)                | 93 (93.0)    |
| No                                              | 4628 (100.0)           | 4019 (86.8)         | 3211 (79.9)           | 2984 (92.9)        | 2257 (75.6)                  | 1896 (84.0)               | 1751 (92.4)  |
| <b>Period of HCV diagnosis</b>                  |                        |                     |                       |                    |                              |                           |              |
| 1990-2013                                       | 3859 (100.0)           | 3310 (85.8)         | 2722 (82.2)           | 2573 (94.5)        | 1990 (77.3)                  | 1670 (83.9)               | 1530 (91.6)  |
| 2014-2018                                       | 1003 (100.0)           | 910 (90.7)          | 655 (72.0)            | 569 (86.9)         | 398 (69.9)                   | 326 (81.9)                | 314 (96.3)   |

**Table S6.** Predictors of not having received RNA testing or initiated treatment as of 2018 among immigrants, and changes since 2013, using generalized estimating equation logistic regression analysis.

| Characteristics <sup>a</sup>                   | Model A: Left behind of RNA testing |         |                                |                   | Model B: Left behind of treatment initiation |         |                                |                   |
|------------------------------------------------|-------------------------------------|---------|--------------------------------|-------------------|----------------------------------------------|---------|--------------------------------|-------------------|
|                                                | Overall effect: 2018                |         | Interaction terms <sup>b</sup> |                   | Overall effect: 2018                         |         | Interaction terms <sup>b</sup> |                   |
|                                                | aOR (95% CI)                        | P value | 2013 aOR (95% CI)              | 2018 aOR (95% CI) | aOR (95% CI)                                 | P value | 2013 aOR (95% CI)              | 2018 aOR (95% CI) |
| <b>Sex</b>                                     |                                     |         |                                |                   |                                              |         |                                |                   |
| Male (Ref)                                     | 1 (Ref)                             |         | --                             | --                | --                                           | --      | --                             | --                |
| Female                                         | 0.97 (0.81-1.15)                    | 0.711   | --                             | --                | --                                           | --      | 1.29 (1.11-1.51)*              | 1.06 (0.91-1.23)  |
| <b>Birth cohort</b>                            |                                     |         |                                |                   |                                              |         |                                |                   |
| <1945                                          | 1.79 (1.33-2.40)                    | 0.001   | --                             | --                | 5.11 (4.03-6.49)                             | <.0001  | --                             | --                |
| 1945-1965                                      | 0.96 (0.80-1.17)                    | 0.710   | --                             | --                | 1.11 (0.95-1.29)                             | 0.206   | --                             | --                |
| >1965 (Ref)                                    | 1 (Ref)                             |         | --                             | --                | 1 (Ref)                                      | 1 (Ref) | --                             | --                |
| <b>PWID</b>                                    |                                     |         |                                |                   |                                              |         |                                |                   |
| No (Ref)                                       | 1 (Ref)                             |         | --                             | --                | --                                           | --      | 1 (Ref)                        | 1 (Ref)           |
| Yes                                            | 0.92 (0.64-1.32)                    | 0.651   | --                             | --                | --                                           | --      | 1.35 (1.04-1.76)*              | 0.80 (0.60-1.05)  |
| <b>Region of origin</b>                        |                                     |         |                                |                   |                                              |         |                                |                   |
| East Asia And Pacific                          | 1.19 (0.87-1.62)                    | 0.266   | --                             | --                | --                                           | --      | 1.15 (0.88-1.50)               | 0.87 (0.67-1.14)  |
| South Asia                                     | 0.87 (0.59-1.27)                    | 0.457   | --                             | --                | --                                           | --      | 0.87 (0.62-1.23)               | 1.13 (0.82-1.55)  |
| Middle East & North Africa                     | 0.91 (0.65-1.28)                    | 0.593   | --                             | --                | --                                           | --      | 1.03 (0.77-1.37)               | 1.09 (0.83-1.44)  |
| Sub Saharan Africa                             | 0.92 (0.65-1.30)                    | 0.644   | --                             | --                | --                                           | --      | 1.30 (0.95-1.78)               | 1.04 (0.77-1.42)  |
| High Income Regions <sup>c</sup> (Ref)         | 1 (Ref)                             |         | --                             | --                | --                                           | --      | 1 (Ref)                        | 1 (Ref)           |
| Middle Income Europe & Central Asia            | 0.84 (0.60-1.18)                    | 0.312   | --                             | --                | --                                           | --      | 1.25 (0.91-1.72)               | 1.04 (0.77-1.40)  |
| Latin America and Caribbean                    | 1.50 (1.02-2.22)                    | 0.040   | --                             | --                | --                                           | --      | 1.45 (1.07-1.98)*              | 1.46 (1.07-2.00)* |
| <b>Region of residence</b>                     |                                     |         |                                |                   |                                              |         |                                |                   |
| Rural                                          | 1.31 (1.01-1.69)                    | 0.045   | --                             | --                | 0.88 (0.70-1.11)                             | 0.279   | --                             | --                |
| Urban (Ref)                                    | 1 (Ref)                             |         | --                             | --                | 1 (Ref)                                      |         | --                             | --                |
| <b>Material deprivation index</b>              |                                     |         |                                |                   |                                              |         |                                |                   |
| 1 (Most privileged) (Ref)                      | 1 (Ref)                             |         | --                             | --                | --                                           | --      | 1 (Ref)                        | 1 (Ref)           |
| 2                                              | 1.20 (0.85-1.68)                    | 0.299   | --                             | --                | --                                           | --      | 1.26 (0.96-1.66)               | 1.15 (0.89-1.49)  |
| 3                                              | 1.11 (0.78-1.57)                    | 0.567   | --                             | --                | --                                           | --      | 1.17 (0.90-1.53)               | 1.04 (0.80-1.35)  |
| 4                                              | 1.21 (0.89-1.64)                    | 0.224   | --                             | --                | --                                           | --      | 1.08 (0.81-1.44)               | 1.07 (0.82-1.41)  |
| 5 (Most deprived)                              | 1.33 (0.98-1.80)                    | 0.071   | --                             | --                | --                                           | --      | 1.66 (1.30-2.12)               | 1.24 (0.98-1.57)  |
| <b>Social deprivation index</b>                |                                     |         |                                |                   |                                              |         |                                |                   |
| 1 (Most privileged)                            | 1 (Ref)                             |         | --                             | --                | --                                           | --      | --                             | --                |
| 2                                              | 0.97 (0.64-1.48)                    | 0.904   | --                             | --                | 0.88 (0.70-1.11)                             | 0.279   | --                             | --                |
| 3                                              | 1.17 (0.79-1.72)                    | 0.433   | --                             | --                | 1.16 (0.89-1.50)                             | 0.272   | --                             | --                |
| 4                                              | 1.14 (0.81-1.58)                    | 0.454   | --                             | --                | 1.26 (0.97-1.63)                             | 0.088   | --                             | --                |
| 5 (Most deprived) (Ref)                        | 1.13 (0.80-1.60)                    | 0.487   | --                             | --                | 1.37 (1.07-1.76)                             | 0.013   | --                             | --                |
| <b>Elixhauser comorbidity index (modified)</b> |                                     |         |                                |                   |                                              |         |                                |                   |
| No (Ref)                                       | 1 (Ref)                             |         | --                             | --                | 1 (Ref)                                      |         | --                             | --                |
| Yes                                            | 0.92 (0.58-1.45)                    | 0.713   | --                             | --                | 1.16 (0.84-1.62)                             | 0.359   | --                             | --                |
| <b>Diabetes</b>                                |                                     |         |                                |                   |                                              |         |                                |                   |
| No (Ref)                                       | 1 (Ref)                             |         | --                             | --                | --                                           | --      | 1 (Ref)                        | 1 (Ref)           |
| Yes                                            | 1.03 (0.76-1.40)                    | 0.850   | --                             | --                | --                                           | --      | 0.78 (0.60-1.01)               | 1.11 (0.90-1.38)  |
| <b>Major mental health diagnosis</b>           |                                     |         |                                |                   |                                              |         |                                |                   |
| No (Ref)                                       | 1 (Ref)                             |         | --                             | --                | 1 (Ref)                                      |         | --                             | --                |
| Yes                                            | 0.99 (0.74-1.34)                    | 0.953   | --                             | --                | 1.24 (0.99-1.55)                             | 0.063   | --                             | --                |

| Characteristics <sup>a</sup>    | Model A: Left behind of RNA testing |         |                                |                      | Model B: Left behind of treatment initiation |         |                                |                      |
|---------------------------------|-------------------------------------|---------|--------------------------------|----------------------|----------------------------------------------|---------|--------------------------------|----------------------|
|                                 | Overall effect: 2018                |         | Interaction terms <sup>b</sup> |                      | Overall effect: 2018                         |         | Interaction terms <sup>b</sup> |                      |
|                                 | aOR (95% CI)                        | P value | 2013<br>aOR (95% CI)           | 2018<br>aOR (95% CI) | aOR (95% CI)                                 | P value | 2013<br>aOR (95% CI)           | 2018<br>aOR (95% CI) |
| <b>Alcohol use disorder</b>     |                                     |         |                                |                      |                                              |         |                                |                      |
| No (Ref)                        | 1 (Ref)                             |         | --                             | --                   | 1 (Ref)                                      |         | --                             | --                   |
| Yes                             | 1.16 (0.57-2.35)                    | 0.686   | --                             | --                   | 1.50 (0.94-2.37)                             | 0.086   | --                             | --                   |
| <b>HBV coinfection</b>          |                                     |         |                                |                      |                                              |         |                                |                      |
| No (Ref)                        | 1 (Ref)                             |         | --                             | --                   | 1 (Ref)                                      |         | --                             | --                   |
| Yes                             | 2.59 (1.70-3.93)                    | <0.001  | --                             | --                   | 1.31 (0.85-2.03)                             | 0.227   | --                             | --                   |
| <b>HIV coinfection</b>          |                                     |         |                                |                      |                                              |         |                                |                      |
| No (Ref)                        | --                                  | --      | --                             | --                   | --                                           | --      | 1 (Ref)                        | 1 (Ref)              |
| Yes                             | 0.27 (0.12-0.62)                    | 0.002   | --                             | --                   | --                                           | --      | 1.29 (0.79-2.12)               | 0.41 (0.24-0.71)*    |
| <b>Decompensated cirrhosis</b>  |                                     |         |                                |                      |                                              |         |                                |                      |
| No (Ref)                        | --                                  | --      | --                             | --                   | 1 (Ref)                                      |         | --                             | --                   |
| Yes                             | 0.61 (0.29-1.27)                    | 0.185   | --                             | --                   | 0.94 (0.59-1.50)                             | 0.809   | --                             | --                   |
| <b>Hepatocellular carcinoma</b> |                                     |         |                                |                      |                                              |         |                                |                      |
| No (Ref)                        | --                                  | --      | --                             | --                   | --                                           | --      | 1 (Ref)                        | 1 (Ref)              |
| Yes                             | 0.34 (0.08-1.34)                    | 0.123   | --                             | --                   | --                                           | --      | 1.26 (0.59-2.68)               | 0.41 (0.19-0.89)*    |

Effects for 2013 shown only for characteristics with a significant ( $p < 0.05$ ) change from 2013 to 2018.

aOR, adjusted odds ratios. -- Left blank on purpose. \* $p < 0.05$ . † $p < 0.01$ . ‡ $p < 0.001$ .

<sup>a</sup>Characteristics as of 2018; model also adjusted for calendar year of HCV diagnosis and immigration category.

<sup>b</sup>Adjusted odds ratios generated from interaction terms of each variable with the care cascade calendar year (i.e. 2013 or 2018). Only interaction terms with  $p < 0.05$  were included in the final model and are shown in the table above.

**Table S7.** Sensitivity analysis: predictors of time to RNA testing and treatment initiation among individuals diagnosed with HCV in Quebec, Canada, 1990-2018 using Fine-Gray subdistribution competing risk hazard regression analysis.

| Characteristics <sup>a</sup>                    | HCV diagnosis to RNA testing |         | RNA positive to treatment initiation |         |
|-------------------------------------------------|------------------------------|---------|--------------------------------------|---------|
|                                                 | aHR (95% CI)                 | P value | aHR (95% CI)                         | P value |
| <b>Sex</b>                                      |                              |         |                                      |         |
| Male (Ref)                                      | 1 (Ref)                      |         | 1 (Ref)                              |         |
| Female                                          | 1.00 (0.98-1.03)             | 0.773   | 0.96 (0.93-1.00)                     | 0.048   |
| <b>Birth cohort</b>                             |                              |         |                                      |         |
| <1945                                           | 0.68 (0.64-0.72)             | <0.001  | 0.29 (0.27-0.32)                     | <0.001  |
| 1945-1965                                       | 0.95 (0.93-0.97)             | <0.001  | 0.79 (0.77-0.82)                     | <0.001  |
| >1965 (Ref)                                     | 1 (Ref)                      |         | 1 (Ref)                              |         |
| <b>People who inject drugs<sup>b</sup></b>      |                              |         |                                      |         |
| No (Ref)                                        | 1 (Ref)                      |         | 1 (Ref)                              |         |
| Yes                                             | 0.81 (0.76-0.87)             | <0.001  | 0.66 (0.62-0.71)                     | <0.001  |
| <b>People who inject drugs*time<sup>b</sup></b> | 1.08 (1.05-1.11)             | <0.001  | 1.04 (1.03-1.05)                     | <0.001  |
| <b>Immigrant status</b>                         |                              |         |                                      |         |
| Non-immigrant (Ref)                             | 1 (Ref)                      |         | 1 (Ref)                              |         |
| Immigrant                                       | 1.12 (1.09-1.15)             | <0.001  | 1.42 (1.35-1.48)                     | <0.001  |
| <b>Region of residence</b>                      |                              |         |                                      |         |
| Urban                                           | 1.14 (1.11-1.17)             | <0.001  | 0.99 (0.95-1.03)                     | 0.646   |
| Rural (Ref)                                     | 1 (Ref)                      |         | 1 (Ref)                              |         |
| <b>Material deprivation index</b>               |                              |         |                                      |         |
| 1 (Most privileged) (Ref)                       | 1 (Ref)                      |         | 1 (Ref)                              |         |
| 2                                               | 0.94 (0.90-0.98)             | 0.002   | 0.98 (0.92-1.04)                     | 0.442   |
| 3                                               | 0.95 (0.91-0.99)             | 0.014   | 0.94 (0.88-0.99)                     | 0.029   |
| 4                                               | 0.94 (0.91-0.98)             | 0.002   | 0.94 (0.89-1.00)                     | 0.037   |
| 5 (Most deprived)                               | 0.90 (0.87-0.93)             | <0.001  | 0.87 (0.82-0.92)                     | <0.001  |
| <b>Social deprivation index</b>                 |                              |         |                                      |         |
| 1 (Most privileged) (Ref)                       | 1 (Ref)                      |         | 1 (Ref)                              |         |

| Characteristics <sup>a</sup>                               | HCV diagnosis to RNA testing |         | RNA positive to treatment initiation |         |
|------------------------------------------------------------|------------------------------|---------|--------------------------------------|---------|
|                                                            | aHR (95% CI)                 | P value | aHR (95% CI)                         | P value |
| 2                                                          | 1.01 (0.97-1.06)             | 0.641   | 1.00 (0.93-1.07)                     | 0.933   |
| 3                                                          | 0.98 (0.94-1.03)             | 0.404   | 0.96 (0.90-1.03)                     | 0.282   |
| 4                                                          | 0.95 (0.91-1.00)             | 0.038   | 0.91 (0.85-0.96)                     | 0.002   |
| 5 (Most deprived)                                          | 0.92 (0.89-0.96)             | <0.001  | 0.86 (0.81-0.91)                     | <0.001  |
| <b>Elixhauser comorbidity index (modified)<sup>c</sup></b> |                              |         |                                      |         |
| No (Ref)                                                   | 1 (Ref)                      |         | 1 (Ref)                              |         |
| Yes                                                        | 0.94 (0.89-0.99)             | 0.031   | 0.95 (0.89-1.02)                     | 0.166   |
| <b>Diabetes<sup>d</sup></b>                                |                              |         |                                      |         |
| No (Ref)                                                   | 1 (Ref)                      |         | 1 (Ref)                              |         |
| Yes                                                        | 0.97 (0.92-1.02)             | 0.188   | 1.33 (1.27-1.39)                     | <0.001  |
| <b>Major mental health diagnosis<sup>d</sup></b>           |                              |         |                                      |         |
| No (Ref)                                                   | 1 (Ref)                      |         | 1 (Ref)                              |         |
| Yes                                                        | 1.11 (1.08-1.14)             | <0.001  | 1.14 (1.09-1.19)                     | <0.001  |
| <b>Alcohol use disorder<sup>d</sup></b>                    |                              |         |                                      |         |
| No (Ref)                                                   | 1 (Ref)                      |         | 1 (Ref)                              |         |
| Yes                                                        | 0.94 (0.90-0.97)             | <0.001  | 0.68 (0.64-0.71)                     | <0.001  |
| <b>HBV coinfection<sup>d</sup></b>                         |                              |         |                                      |         |
| No (Ref)                                                   | 1 (Ref)                      |         | 1 (Ref)                              |         |
| Yes                                                        | 0.82 (0.76-0.89)             | <0.001  | 0.96 (0.88-1.04)                     | 0.316   |
| <b>HIV coinfection<sup>d</sup></b>                         |                              |         |                                      |         |
| No (Ref)                                                   | 1 (Ref)                      |         | 1 (Ref)                              |         |
| Yes                                                        | 1.28 (1.21-1.35)             | <0.001  | 1.18 (1.11-1.25)                     | <0.001  |
| <b>Decompensated cirrhosis<sup>d</sup></b>                 |                              |         |                                      |         |
| No (Ref)                                                   | 1 (Ref)                      |         | 1 (Ref)                              |         |
| Yes                                                        | 1.38 (1.30-1.46)             | <0.001  | 1.70 (1.62-1.78)                     | <0.001  |
| <b>Hepatocellular carcinoma<sup>d</sup></b>                |                              |         |                                      |         |
| No (Ref)                                                   | 1 (Ref)                      |         | 1 (Ref)                              |         |
| Yes                                                        | 0.63 (0.52-0.75)             | <0.001  | 0.62 (0.54-0.71)                     | <0.001  |

aHR, adjusted hazard ratios. Model also adjusted for calendar year of HCV diagnosis.

<sup>a</sup>Characteristics at the time of HCV diagnosis, unless otherwise specified. <sup>b</sup>Non-proportional hazards addressed by adding an interaction with time. <sup>c</sup>Diagnostic codes for diabetes, mental health illness, alcohol and drug consumption disorders, HIV, and liver-disease excluded. <sup>d</sup>Time-varying covariates.

**Table S8.** Sensitivity analysis: predictors of time to RNA testing and treatment initiation among individuals diagnosed with HCV in Quebec, Canada, 1990-2018 using Fine-Gray subdistribution competing risk hazard regression analysis (immigrants stratified by World Bank region of origin).

| Characteristics <sup>1</sup>                                    | HCV diagnosis to RNA testing |         | RNA positive to treatment initiation |         |
|-----------------------------------------------------------------|------------------------------|---------|--------------------------------------|---------|
|                                                                 | aHR (95% CI)                 | P value | aHR (95% CI)                         | P value |
| <b>Sex</b>                                                      |                              |         |                                      |         |
| Male (Ref)                                                      | 1 (Ref)                      |         | 1 (Ref)                              |         |
| Female                                                          | 1.00 (0.98-1.03)             | 0.770   | 0.96 (0.93-1.00)                     | 0.054   |
| <b>Birth cohort</b>                                             |                              |         |                                      |         |
| <1945                                                           | 0.68 (0.64-0.72)             | <0.001  | 0.30 (0.27-0.32)                     | <0.001  |
| 1945-1965                                                       | 0.95 (0.93-0.98)             | <0.001  | 0.80 (0.77-0.82)                     | <0.001  |
| >1965 (Ref)                                                     | 1 (Ref)                      |         | 1 (Ref)                              |         |
| <b>People who inject drugs<sup>2</sup></b>                      |                              |         |                                      |         |
| No (Ref)                                                        | 1 (Ref)                      |         | 1 (Ref)                              |         |
| Yes                                                             | 0.81 (0.76-0.87)             | <0.001  | 0.66 (0.62-0.71)                     | <0.001  |
| <b>People who inject drugs*time<sup>2</sup></b><br>(Continuous) | 1.08 (1.05-1.11)             | <0.001  | 1.04 (1.03-1.05)                     | <0.001  |
| <b>Region of birth</b>                                          |                              |         |                                      |         |
| Canada (Ref)                                                    | 1 (Ref)                      |         | 1 (Ref)                              |         |
| East Asia and Pacific                                           | 1.09 (1.02-1.17)             | 0.013   | 1.43 (1.30-1.57)                     | <0.001  |
| High Income Regions                                             | 1.10 (1.05-1.16)             | <0.001  | 1.41 (1.29-1.54)                     | <0.001  |
| Latin America and Caribbean                                     | 0.95 (0.86-1.05)             | 0.308   | 1.16 (1.01-1.33)                     | 0.041   |
| Middle East & North Africa                                      | 1.17 (1.09-1.25)             | <0.001  | 1.52 (1.35-1.72)                     | <0.001  |
| South Asia                                                      | 1.16 (1.08-1.24)             | <0.001  | 1.43 (1.26-1.63)                     | <0.001  |
| Sub Saharan Africa                                              | 1.20 (1.12-1.29)             | <0.001  | 1.42 (1.28-1.59)                     | <0.001  |
| Middle Income Europe & Central Asia                             | 1.19 (1.13-1.26)             | <0.001  | 1.52 (1.35-1.70)                     | <0.001  |
| <b>Region of residence</b>                                      |                              |         |                                      |         |
| Urban                                                           | 1.14 (1.11-1.17)             | <0.001  | 0.99 (0.95-1.03)                     | 0.625   |

| Characteristics <sup>1</sup>                               | HCV diagnosis to RNA testing |         | RNA positive to treatment initiation |         |
|------------------------------------------------------------|------------------------------|---------|--------------------------------------|---------|
|                                                            | aHR (95% CI)                 | P value | aHR (95% CI)                         | P value |
| Rural (Ref)                                                | 1 (Ref)                      |         | 1 (Ref)                              |         |
| <b>Material deprivation index</b>                          |                              |         |                                      |         |
| 1 (Most privileged) (Ref)                                  | 1 (Ref)                      |         | 1 (Ref)                              |         |
| 2                                                          | 0.94 (0.90-0.98)             | 0.002   | 0.98 (0.92-1.04)                     | 0.457   |
| 3                                                          | 0.95 (0.91-0.99)             | 0.012   | 0.94 (0.88-0.99)                     | 0.028   |
| 4                                                          | 0.94 (0.91-0.98)             | 0.002   | 0.94 (0.89-1.00)                     | 0.037   |
| 5 (Most deprived)                                          | 0.90 (0.87-0.93)             | <0.001  | 0.87 (0.82-0.92)                     | <0.001  |
| <b>Social deprivation index</b>                            |                              |         |                                      |         |
| 1 (Most privileged) (Ref)                                  | 1 (Ref)                      |         | 1 (Ref)                              |         |
| 2                                                          | 1.01 (0.97-1.06)             | 0.659   | 1.00 (0.93-1.07)                     | 0.944   |
| 3                                                          | 0.98 (0.94-1.03)             | 0.393   | 0.96 (0.90-1.03)                     | 0.288   |
| 4                                                          | 0.95 (0.91-1.00)             | 0.038   | 0.91 (0.85-0.97)                     | 0.002   |
| 5 (Most deprived)                                          | 0.92 (0.88-0.96)             | <0.001  | 0.86 (0.81-0.91)                     | <0.001  |
| <b>Year of HCV diagnosis</b><br>(Continuous)               | 1.06 (1.06-1.06)             | <0.001  | 1.04 (1.03-1.04)                     | <0.001  |
| <b>Elixhauser comorbidity index (modified)<sup>3</sup></b> |                              |         |                                      |         |
| No (Ref)                                                   | 1 (Ref)                      |         | 1 (Ref)                              |         |
| Yes                                                        | 0.94 (0.90-0.99)             | 0.032   | 0.95 (0.89-1.02)                     | 0.173   |
| <b>Diabetes<sup>4</sup></b>                                |                              |         |                                      |         |
| No (Ref)                                                   | 1 (Ref)                      |         | 1 (Ref)                              |         |
| Yes                                                        | 0.97 (0.92-1.02)             | 0.181   | 1.33 (1.27-1.39)                     | <0.001  |
| <b>Major mental health diagnosis<sup>4</sup></b>           |                              |         |                                      |         |
| No (Ref)                                                   | 1 (Ref)                      |         | 1 (Ref)                              |         |
| Yes                                                        | 1.11 (1.08-1.14)             | <0.001  | 1.14 (1.09-1.19)                     | <0.001  |
| <b>Alcohol use disorder <sup>4</sup></b>                   |                              |         |                                      |         |
| No (Ref)                                                   | 1 (Ref)                      |         | 1 (Ref)                              |         |
| Yes                                                        | 0.94 (0.90-0.97)             | <0.001  | 0.68 (0.64-0.71)                     | <0.001  |
| <b>HBV coinfection<sup>4</sup></b>                         |                              |         |                                      |         |
| No (Ref)                                                   | 1 (Ref)                      |         | 1 (Ref)                              |         |
| Yes                                                        | 0.82 (0.76-0.88)             | <0.001  | 0.96 (0.88-1.04)                     | 0.307   |
| <b>HIV coinfection<sup>4</sup></b>                         |                              |         |                                      |         |
| No (Ref)                                                   | 1 (Ref)                      |         | 1 (Ref)                              |         |
| Yes                                                        | 1.28 (1.21-1.35)             | <0.001  | 1.19 (1.12-1.26)                     | <0.001  |
| <b>Decompensated cirrhosis<sup>4</sup></b>                 |                              |         |                                      |         |
| No (Ref)                                                   | 1 (Ref)                      |         | 1 (Ref)                              |         |
| Yes                                                        | 1.38 (1.30-1.47)             | <0.001  | 1.70 (1.62-1.78)                     | <0.001  |
| <b>Hepatocellular carcinoma<sup>4</sup></b>                |                              |         |                                      |         |
| No (Ref)                                                   | 1 (Ref)                      |         | 1 (Ref)                              |         |
| Yes                                                        | 0.62 (0.52-0.75)             | <0.001  | 0.62 (0.54-0.71)                     | <0.001  |

aHR, adjusted hazard ratios.

<sup>1</sup>Characteristics at the time of HCV diagnosis, unless otherwise specified. <sup>2</sup>Non-proportional hazards addressed by adding an interaction with time. <sup>3</sup>Diagnostic codes for diabetes, mental health illness, alcohol and drug consumption disorders, HIV, and liver-disease excluded. <sup>4</sup>Time-varying covariates.

**Table S9.** Sensitivity analysis: predictors of time to RNA testing and treatment initiation among immigrants diagnosed with HCV in Quebec, Canada, 1990-2018 using Fine-Gray subdistribution competing risk hazard regression analysis.

| Characteristics <sup>a</sup>               | HCV diagnosis to RNA testing |         | RNA positive to treatment initiation |         |
|--------------------------------------------|------------------------------|---------|--------------------------------------|---------|
|                                            | aHR (95% CI)                 | P value | aHR (95% CI)                         | P value |
| <b>Sex</b>                                 |                              |         |                                      |         |
| Male (Ref)                                 | 1 (Ref)                      |         | 1 (Ref)                              |         |
| Female                                     | 1.00 (0.94-1.06)             | 0.998   | 0.91 (0.84-0.98)                     | 0.018   |
| <b>Birth cohort</b>                        |                              |         |                                      |         |
| <1945                                      | 0.70 (0.62-0.79)             | <0.001  | 0.38 (0.32-0.46)                     | <0.001  |
| 1945-1965                                  | 1.00 (0.95-1.06)             | 0.925   | 0.97 (0.89-1.05)                     | 0.437   |
| >1965 (Ref)                                | 1 (Ref)                      |         | 1 (Ref)                              |         |
| <b>People who inject drugs<sup>b</sup></b> |                              |         |                                      |         |
| No (Ref)                                   | 1 (Ref)                      |         | 1 (Ref)                              |         |
| Yes                                        | 0.83 (0.71-0.97)             | 0.018   | 0.66 (0.53-0.83)                     | <0.001  |
| <b>People who inject drugs*time</b>        | 1.05 (0.97-1.13)             | 0.246   | 1.06 (1.03-1.09)                     | <0.001  |
| <b>Region of residence</b>                 |                              |         |                                      |         |
| Urban                                      | 1.15 (1.03-1.29)             | 0.011   | 1.03 (0.90-1.19)                     | 0.647   |
| Rural (Ref)                                | 1 (Ref)                      |         | 1 (Ref)                              |         |
| <b>Material deprivation index</b>          |                              |         |                                      |         |
| 1 (Most privileged)                        | 1 (Ref)                      |         | 1 (Ref)                              |         |
| 2                                          | 0.97 (0.89-1.05)             | 0.435   | 0.96 (0.83-1.09)                     | 0.507   |
| 3                                          | 0.97 (0.87-1.07)             | 0.544   | 0.94 (0.83-1.08)                     | 0.394   |

| Characteristics <sup>a</sup>                          | HCV diagnosis to RNA testing |         | RNA positive to treatment initiation |         |
|-------------------------------------------------------|------------------------------|---------|--------------------------------------|---------|
|                                                       | aHR (95% CI)                 | P value | aHR (95% CI)                         | P value |
| 4                                                     | 0.96 (0.87-1.04)             | 0.313   | 0.98 (0.86-1.11)                     | 0.728   |
| 5 (Most deprived) (Ref)                               | 0.95 (0.88-1.04)             | 0.258   | 0.91 (0.80-1.03)                     | 0.122   |
| <b>Social deprivation index</b>                       |                              |         |                                      |         |
| 1 (Most privileged)                                   | 1 (Ref)                      |         | 1 (Ref)                              |         |
| 2                                                     | 1.04 (0.92-1.17)             | 0.566   | 0.98 (0.83-1.16)                     | 0.824   |
| 3                                                     | 0.99 (0.87-1.12)             | 0.819   | 1.02 (0.87-1.19)                     | 0.830   |
| 4                                                     | 0.95 (0.84-1.08)             | 0.455   | 1.00 (0.86-1.15)                     | 0.948   |
| 5 (Most deprived) (Ref)                               | 0.97 (0.86-1.09)             | 0.640   | 0.94 (0.82-1.08)                     | 0.399   |
| <b>Region of birth</b>                                |                              |         |                                      |         |
| High Income Regions (Ref)                             | 1 (Ref)                      |         | 1 (Ref)                              |         |
| East Asia and Pacific                                 | 0.96 (0.87-1.07)             | 0.455   | 1.05 (0.92-1.21)                     | 0.449   |
| Latin America and Caribbean                           | 0.86 (0.74-1.00)             | 0.046   | 0.82 (0.69-0.98)                     | 0.027   |
| Middle East & North Africa                            | 1.05 (0.95-1.16)             | 0.385   | 1.06 (0.91-1.23)                     | 0.488   |
| South Asia                                            | 1.07 (0.95-1.20)             | 0.298   | 1.06 (0.88-1.26)                     | 0.546   |
| Sub Saharan Africa                                    | 1.06 (0.97-1.17)             | 0.204   | 0.98 (0.84-1.14)                     | 0.754   |
| Middle Income Europe & Central Asia                   | 1.06 (0.96-1.16)             | 0.252   | 1.06 (0.91-1.23)                     | 0.482   |
| <b>Immigration category</b>                           |                              |         |                                      |         |
| Economic (Ref)                                        | 1 (Ref)                      |         | 1 (Ref)                              |         |
| Family                                                | 0.94 (0.87-1.01)             | 0.102   | 0.95 (0.86-1.04)                     | 0.266   |
| Refugee                                               | 0.99 (0.91-1.07)             | 0.766   | 0.92 (0.83-1.03)                     | 0.154   |
| <b>Years from admission to diagnosis (continuous)</b> | 1.00 (0.99-1.00)             | 0.719   | 1.00 (0.99-1.00)                     | 0.159   |
| <b>Year of HCV diagnosis (continuous)</b>             | 1.05 (1.04-1.06)             | <0.001  | 1.06 (1.05-1.07)                     | <0.001  |
| <b>Diabetes</b>                                       |                              |         |                                      |         |
| No (Ref)                                              | 1 (Ref)                      |         | 1 (Ref)                              |         |
| Yes                                                   | 1.06 (0.95-1.18)             | 0.317   | 1.26 (1.14-1.39)                     | <0.001  |
| <b>Elixhauser comorbidity index (modified)</b>        |                              |         |                                      |         |
| No (Ref)                                              | 1 (Ref)                      |         | 1 (Ref)                              |         |
| Yes                                                   | 0.93 (0.74-1.18)             | 0.567   | 0.98 (0.80-1.20)                     | 0.852   |
| <b>Major mental health diagnosis<sup>b</sup></b>      |                              |         |                                      |         |
| No (Ref)                                              | 1 (Ref)                      |         | 1 (Ref)                              |         |
| Yes                                                   | 1.12 (1.01-1.25)             | 0.027   | 1.06 (0.96-1.16)                     | 0.283   |
| <b>Alcohol use disorder <sup>b</sup></b>              |                              |         |                                      |         |
| No (Ref)                                              | 1 (Ref)                      |         | 1 (Ref)                              |         |
| Yes                                                   | 0.98 (0.76-1.26)             | 0.849   | 0.64 (0.51-0.81)                     | <0.001  |
| <b>HBV coinfection<sup>b</sup></b>                    |                              |         |                                      |         |
| No (Ref)                                              | 1 (Ref)                      |         | 1 (Ref)                              |         |
| Yes                                                   | 0.76 (0.60-0.96)             | 0.021   | 0.99 (0.80-1.21)                     | 0.891   |
| <b>HIV coinfection<sup>b</sup></b>                    |                              |         |                                      |         |
| No (Ref)                                              | 1 (Ref)                      |         | 1 (Ref)                              |         |
| Yes                                                   | 1.22 (1.04-1.43)             | 0.013   | 1.33 (1.11-1.60)                     | 0.002   |
| <b>Decompensated cirrhosis<sup>b</sup></b>            |                              |         |                                      |         |
| No (Ref)                                              | 1 (Ref)                      |         | 1 (Ref)                              |         |
| Yes                                                   | 1.36 (1.13-1.64)             | 0.001   | 1.58 (1.42-1.75)                     | <0.001  |
| <b>Hepatocellular carcinoma<sup>b</sup></b>           |                              |         |                                      |         |
| No (Ref)                                              | 1 (Ref)                      |         | 1 (Ref)                              |         |
| Yes                                                   | 0.71 (0.45-1.14)             | 0.155   | 0.62 (0.46-0.83)                     | 0.001   |

aHR, adjusted hazard ratios. <sup>a</sup>Characteristics at the time of HCV diagnosis, unless otherwise specified. <sup>b</sup>Time-varying covariates.

**Figure S1.** Flowchart of the identification of hepatitis C diagnosis and cohort creation.

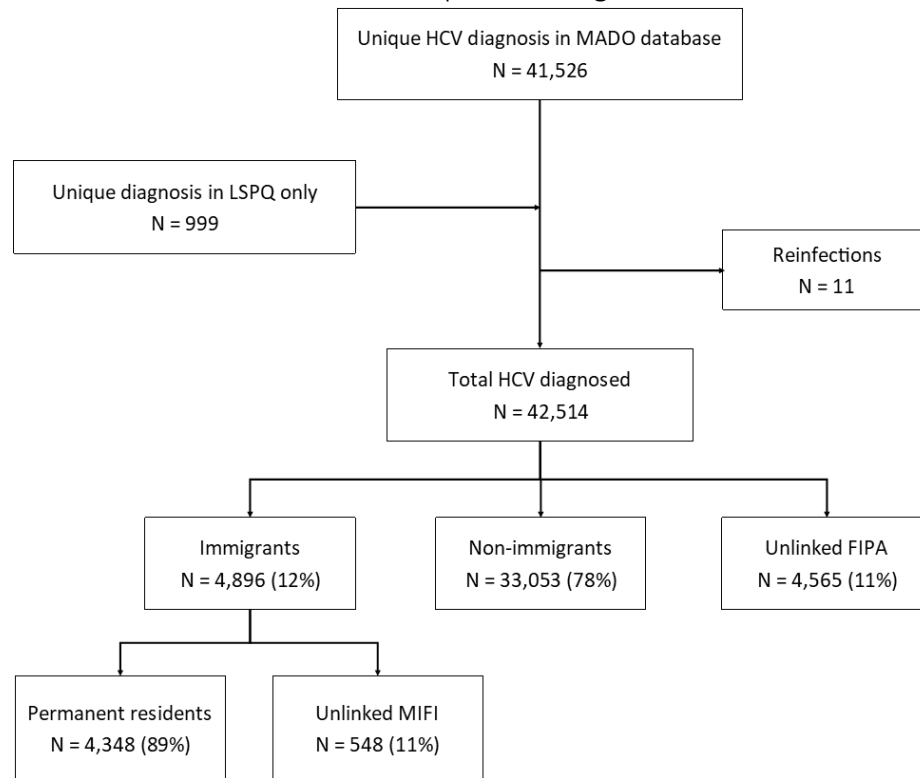

Abbreviations: MADO, public health reportable diseases database (“Maladies à déclaration obligatoire”); LSPQ, provincial reference laboratory database (“Laboratoire de santé publique du Québec”); FIPA, database for province healthcare covered individuals (“Fichier d’inscription des personnes assurées”); MIFI, landed immigrants database (“Ministry of Immigration, Frenchisation and Integration”).

#### Care cascade backfilling:

The HCV care cascade cohort included all confirmed HCV antibody diagnoses reported to the public health reportable diseases database (MADO) and all the confirmed HCV RNA diagnoses present in the provincial reference laboratory database (LSPQ). As seen in **Figure S1** above, 999 (2.3%) of all HCV diagnoses in the cohort were only present in LSPQ but not MADO; the “HCV diagnosed” step of the care cascade was backfilled for these individuals. We also backfilled care cascade steps for individuals with an observed genotype test or antiviral treatment dispensation, which accounted for 1.7% of all HCV diagnoses in the cohort.

**Figure S2.** Intersectionality of priority groups among individuals diagnosed with HCV since 1990 and alive in 2018, Quebec, Canada.

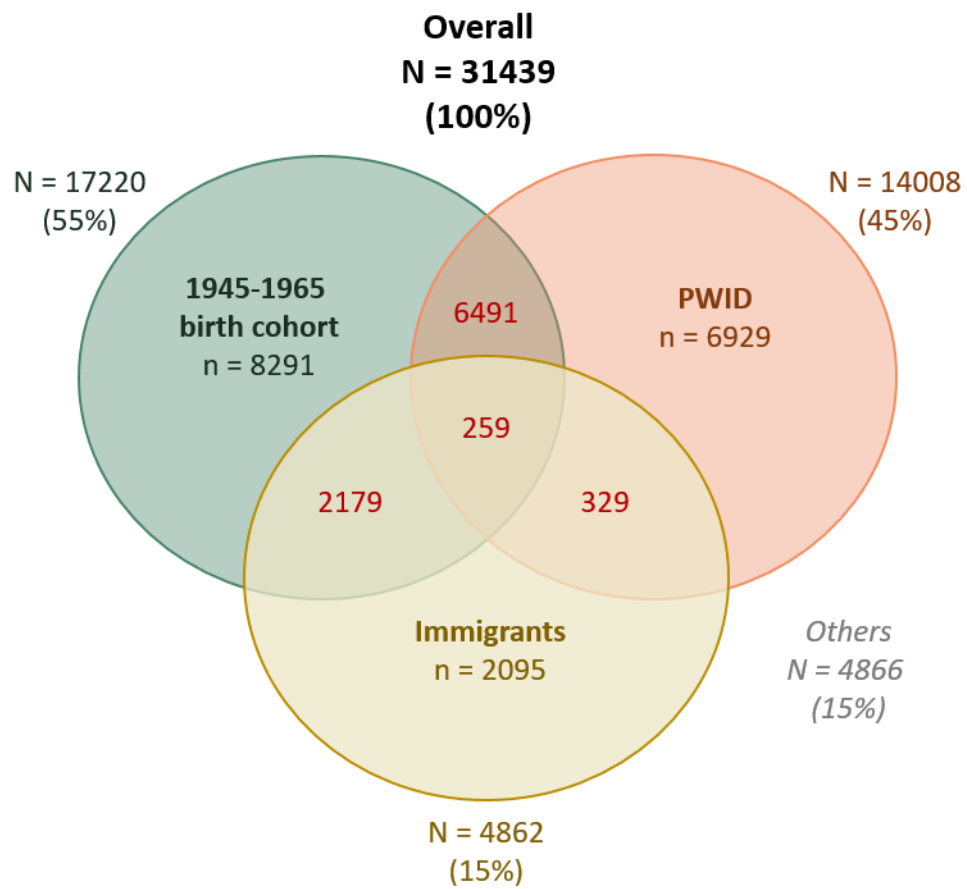



**Figure S3.** Time-varying hazard for people who inject drugs (PWID) diagnosed with HCV in Quebec, Canada, 1990-2018. Shown are adjusted hazard ratios (aHR) with 95% confidence intervals (CI) over time from (A) HCV diagnosis to RNA testing and from (B) RNA positive to treatment initiation. These data result from the inclusion of an interaction of the PWID variable and time to event in the Fine-Gray subdistribution competing hazard regression model (shown in Table 2).

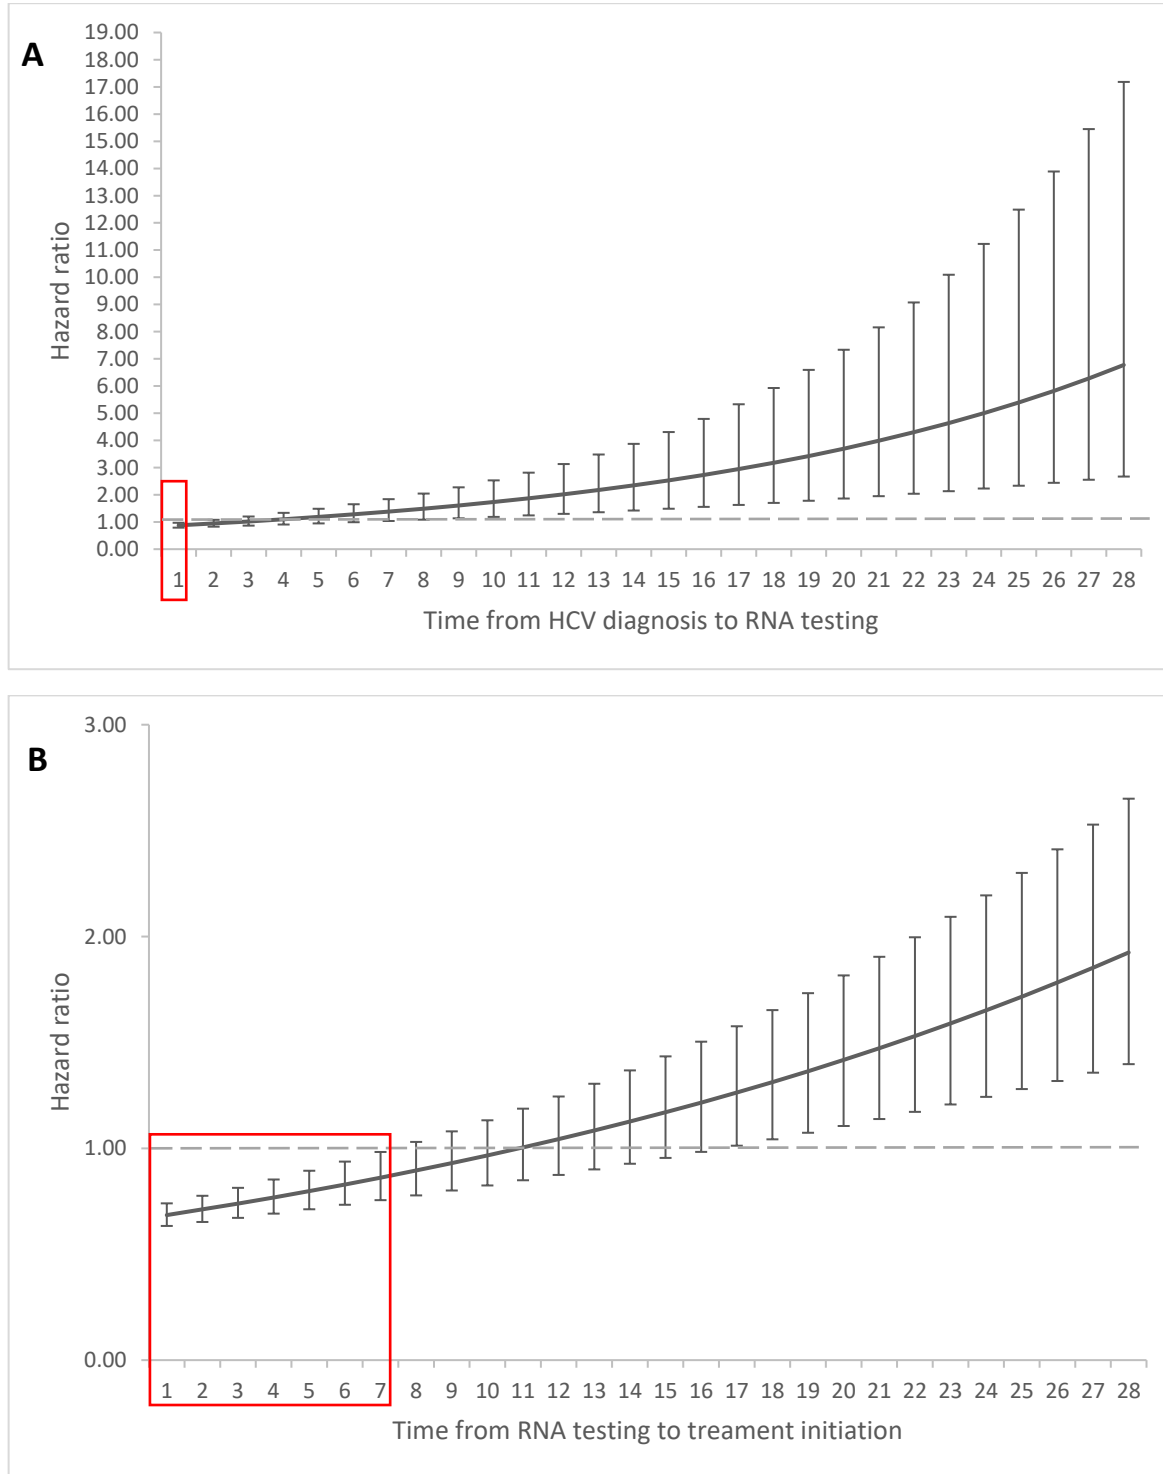

## Supplementary References

1. Janjua NZ, Islam N, Kuo M, Yu A, Wong S, Butt ZA, et al. Identifying injection drug use and estimating population size of people who inject drugs using healthcare administrative datasets. *Int J Drug Policy*. 2018;55:31-9.
2. Greenwald Z, Feld J, Werb D, et al. Validation of case-ascertainment algorithms to identify people who inject drugs in health administrative data in Ontario. *Canadian Liver Journal [Canadian Liver Meeting]*. 2022;CLM22-ABS- 1037.
3. Bruneau J, Lamothe F, Soto J, Lachance N, Vincelette J, Vassal A, et al. Sex-specific determinants of HIV infection among injection drug users in Montreal. *Cmaj*. 2001;164(6):767-73.
4. Bruneau J, Roy E, Arruda N, Zang G, Jutras-Aswad D. The rising prevalence of prescription opioid injection and its association with hepatitis C incidence among street-drug users. *Addiction*. 2012;107(7):1318-27.
5. Jacka B, Larney S, Degenhardt L, Janjua N, Hoj S, Krajden M, et al. Prevalence of Injecting Drug Use and Coverage of Interventions to Prevent HIV and Hepatitis C Virus Infection Among People Who Inject Drugs in Canada. *Am J Public Health*. 2020;110(1):45-50.
6. Steyerberg EW, Vickers AJ, Cook NR, Gerds T, Gonen M, Obuchowski N, et al. Assessing the performance of prediction models: a framework for traditional and novel measures. *Epidemiology*. 2010;21(1):128-38.
7. Action Hepatitis Canada. Progress Towards Viral Hepatitis Elimination By 2030 In Canada. Internet. Toronto, ON: AHC; 2021.
8. Canada I. IQVIA Canada 2022 [Available from: [https://www.iqvia.com/?utm\\_source=google&utm\\_medium=cpc&utm\\_campaign=2021\\_iqvia\\_brand&utm\\_content=93726100272&utm\\_term=%2Biqvia&gclid=CjwKCAjw3qGYBhBSEiwAcnTRLqOxk4VGbKZlsosfPcXdSDuQVilAa7E0FLgLTJBewELxWoe8hq4mgRoCITQQAvD\\_BwE.](https://www.iqvia.com/?utm_source=google&utm_medium=cpc&utm_campaign=2021_iqvia_brand&utm_content=93726100272&utm_term=%2Biqvia&gclid=CjwKCAjw3qGYBhBSEiwAcnTRLqOxk4VGbKZlsosfPcXdSDuQVilAa7E0FLgLTJBewELxWoe8hq4mgRoCITQQAvD_BwE.)]
